# Supplementary material
Source: Springer Nature journal article supplement (https://www.springermedizin.de/resource/supplementary/13012_2013_708_MOESM6_ESM.pdf/9630292)

### **Characteristics of the implementation strategy**

- Compatibility (OT, MD) (+)
- Added value (OT, MD, M) (+)
- Familiarity with tools (OT) (+)
- Method of dissemination (M, MD) (varied)
- Active attitude required (M, MD) (-)
- Balance cost and benefits (OT) (+)

### **Characteristics of the professional**

- Commitment (OT) (+)
- More client groups / specialties (OT) (-)
- Perceived need for information (M) (+)
- Familiarity with the innovation (MD, M) (-)
- Priority of innovation (M) (+)
- Degree of involvement (M) (+)
- Number of eligible clients (MD) (+)

### **Characteristics of the organization**

- High workload pressure (MD) (-)
- Calm work environment (OT) (+)
- Presence of colleagues (OT) (-)

**Exposure  
to the implementation  
strategy**

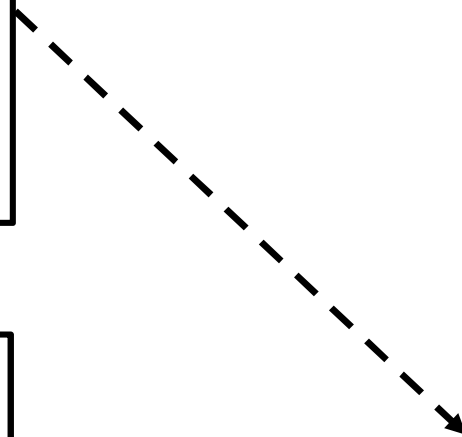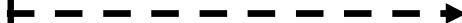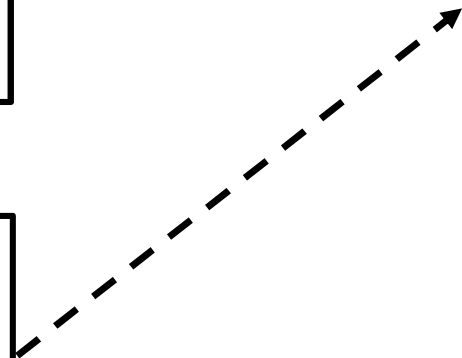

Supplement: MOESM6 [file 9630292]
